# Supplementary material
Source: PubMed Central journal article supplement (PMC9117509)
Supplement: NIHMS1794537-supplement-1794537_Sup_info.pdf [file NIHMS1794537-supplement-1794537_Sup_info.pdf]

**Supplementary Table 1 | Oligonucleotides used in this study.**

| <b>Name</b>          | <b>Length (nt/bp)</b> | <b>GC%</b> | <b>Sequence</b>                                                                                                                                                                                      |
|----------------------|-----------------------|------------|------------------------------------------------------------------------------------------------------------------------------------------------------------------------------------------------------|
| ssDNA <sub>16</sub>  | 16                    | 50         | TGT ACT TCT AGA GGC C                                                                                                                                                                                |
| ssDNA <sub>30</sub>  | 30                    | 50         | GCA TGT ATT GAA GTA CTT CTA GAG GCC GCC                                                                                                                                                              |
| dsDNA <sub>30</sub>  | 30                    | 50         | same as above                                                                                                                                                                                        |
| RNA <sub>16</sub>    | 16                    | 50         | rUrGrU rArCrU rUrCrU rArGrA rGrGrC rC                                                                                                                                                                |
| RNA <sub>30</sub>    | 30                    | 50         | rGrCrA rUrGrU rArUrU rGrArA rGrUrA rCrUrU rCrUrA rGrArG rGrCrC rGrCrC                                                                                                                                |
| RNA <sub>60</sub>    | 60                    | 50         | rGrCrA rUrGrU rArUrU rGrArA rGrUrA rCrUrU rCrUrA rGrArG rGrCrC rGrCrC rGrCrA rUrGrU rArUrU rGrArA rGrUrA rCrUrU rCrUrA rGrArG rGrCrC rGrCrC                                                          |
| ssDNA <sub>70</sub>  | 70                    | 50         | GCA TGT ATT GAA GTA CTT CTA GAG GCC GCC GCA TGT ATT GAA GTA CTT CTA GAG GCC GCC TGC CTC TAG A                                                                                                        |
| dsDNA <sub>70</sub>  | 70                    | 50         | same as above                                                                                                                                                                                        |
| ssDNA <sub>75</sub>  | 75                    | 33         | CCA AAA CTA ATC TTT ATA TAA ATG GGA GAC TCA CTA TCA TGG CTA CTA CGA CTA CTA AAC GAG GTT AAA ATG AAT                                                                                                  |
| dsDNA <sub>75</sub>  | 75                    | 33         | same as above                                                                                                                                                                                        |
| ssDNA <sub>147</sub> | 147                   | 56         | CT GGA GAA TCC CGG TGC CGA GGC CGC TCA ATT GGT CGT AGA CAG CTC TAG CAC CGC TTA AAC GCA CGT ACG CGC TGT CCC CCG CGT TTT AAC CGC CAA GGG GAT TAC TCC CTA GTC TCC AGG CAC GTG TCA GAT ATA TAC ATC CTG T |

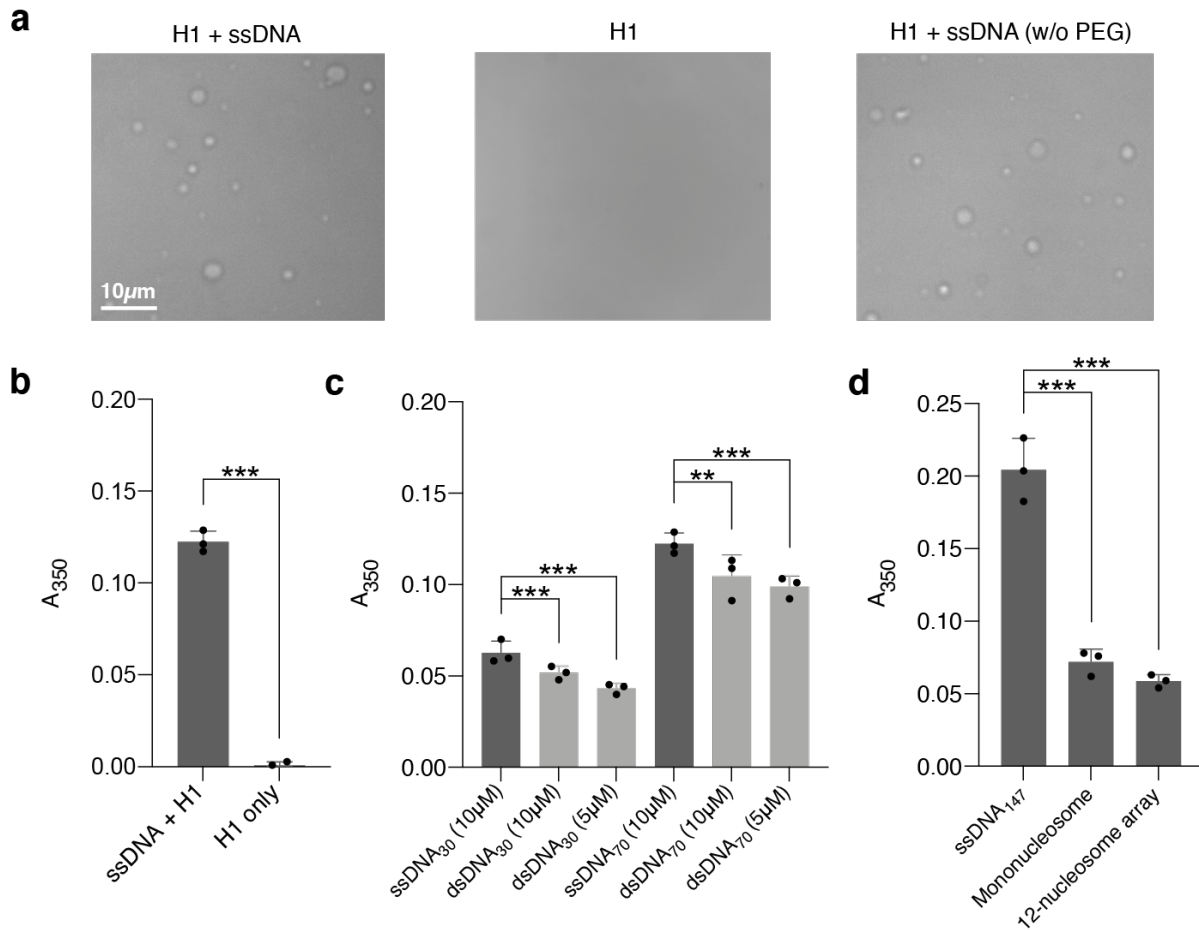

**Supplementary Fig. 1 | Additional results from bulk phase separation assays. a,** Representative brightfield images of H1 mixed with 10 μM ssDNA<sub>75</sub> (left), H1 alone (middle), and H1 mixed with and 10 μM ssDNA<sub>75</sub> in the absence of PEG (right) (among 3 independent experiments). **b,** Solution turbidity (A<sub>350</sub>) measurements for H1 mixed with 10 μM ssDNA<sub>70</sub> and H1 alone. Significance calculated using an unpaired t-test ( $***p < 0.001$ ). **c,** A<sub>350</sub> measurements for H1 mixed with ss/ds DNA<sub>30</sub> or ss/ds DNA<sub>70</sub>. Significance calculated using a one-way ANOVA with Dunnett's test for multiple comparisons ( $**p < 0.01$ ,  $***p < 0.001$ ). **d,** A<sub>350</sub> measurements for H1 mixed with ssDNA<sub>147</sub> (5 μM), mononucleosomes (5 μM), or 12-nucleosome arrays (600 nM). Significance calculated using a one-way ANOVA with Dunnett's test for multiple comparisons ( $***p < 0.001$ ). All experiments were performed with 2.5 μM H1. All A<sub>350</sub> experiments performed with n=3 independent measurements. All data in bar charts presented as mean values ± SD.

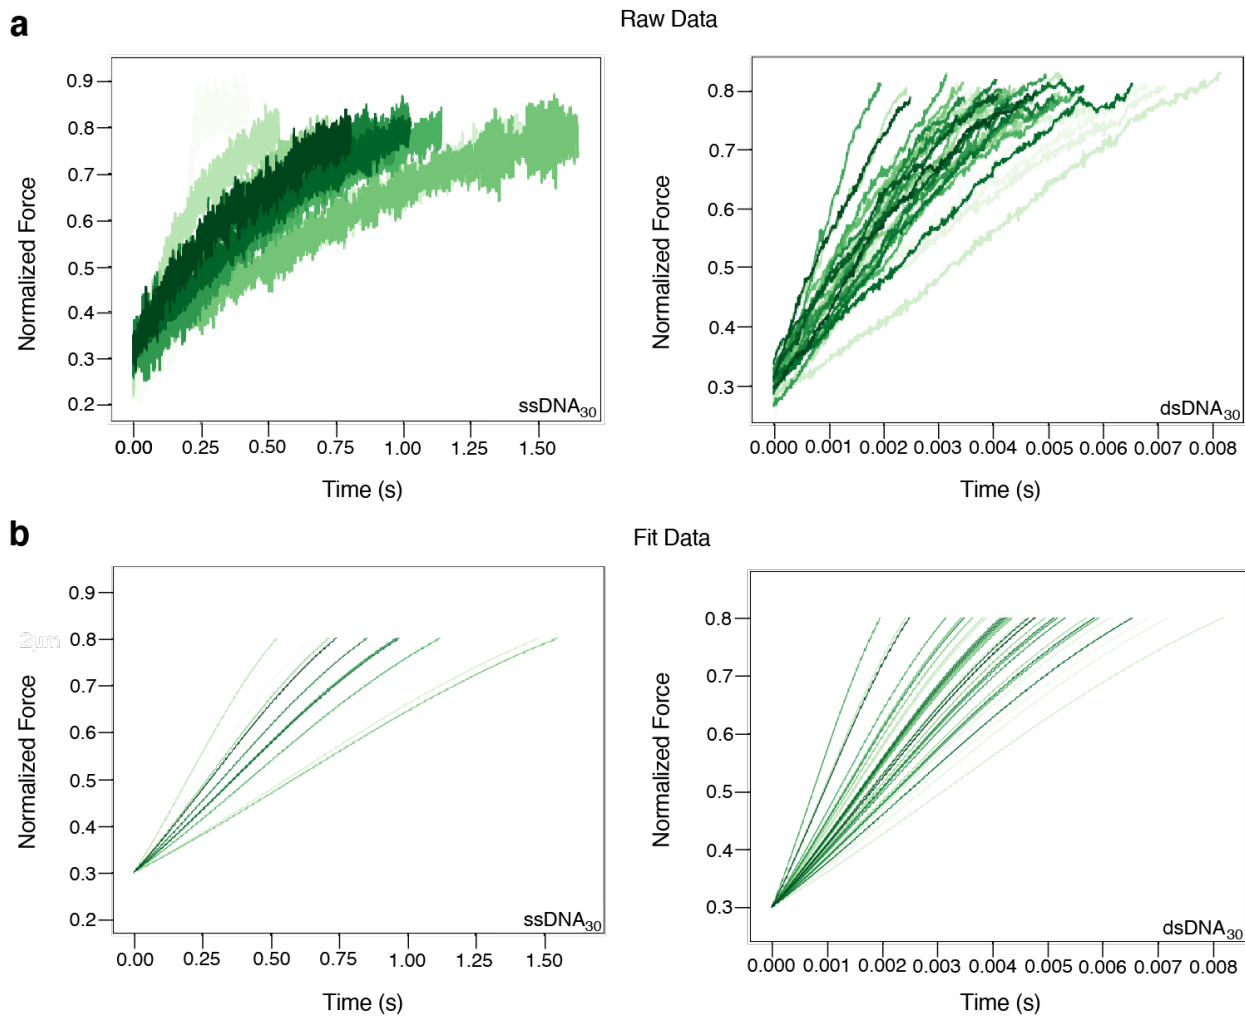

**Supplementary Fig. 2 | Force profiles from droplet fusion experiments. a**, Raw data between the normalized force values of 0.3 and 0.8 for H1:ssDNA<sub>30</sub> (Left) and H1:dsDNA<sub>30</sub> (Right) droplets. Each trace represents a fusion event between two optically trapped droplets. **b**, Corresponding sigmoidal fits of the force-time traces shown in **a**.

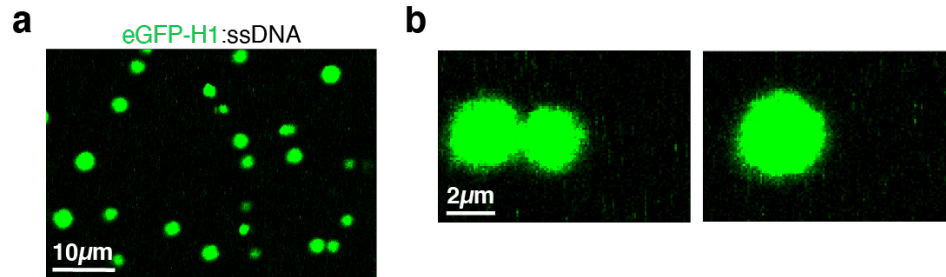

**Supplementary Fig. 3 | eGFP-H1:ssDNA droplet formation and fusion *in vitro*.** **a**, A representative image of droplets (among 3 independent experiments) formed with 2.5 μM recombinant eGFP-H1 and 10 μM ssDNA<sub>75</sub> visualized by GFP fluorescence. **b**, Representative snapshots of two eGFP-H1:ssDNA<sub>75</sub> droplets pre- and post-fusion (among 8 independent fusion events).

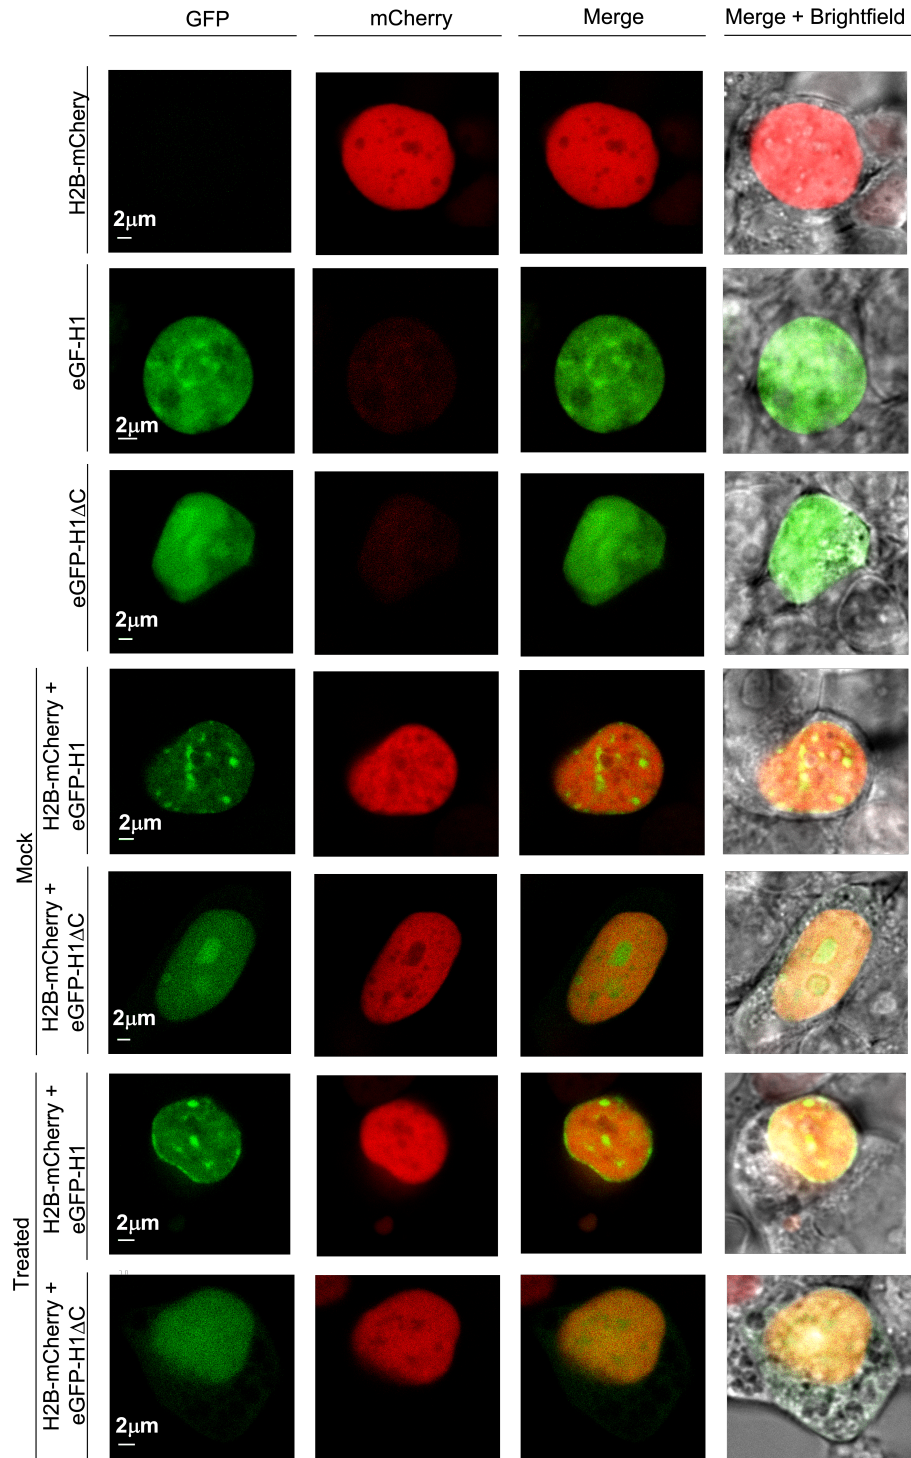

**Supplementary Fig. 4 | Nuclear distributions of eGFP-H1 and H2B-mCherry.**

Representative confocal images of HEK293T cells co-transfected with H2B-mCherry and either eGFP-H1 or eGFP-H1ΔC and treated with either mock or 2 mM HU + 20 μM AZD6738 for 18h. eGFP-H1, mock (n=16 independent nuclei); eGFP-H1ΔC, mock (n= 13); eGFP-H1, treated (n=20); eGFP-H1ΔC, treated (n= 12).

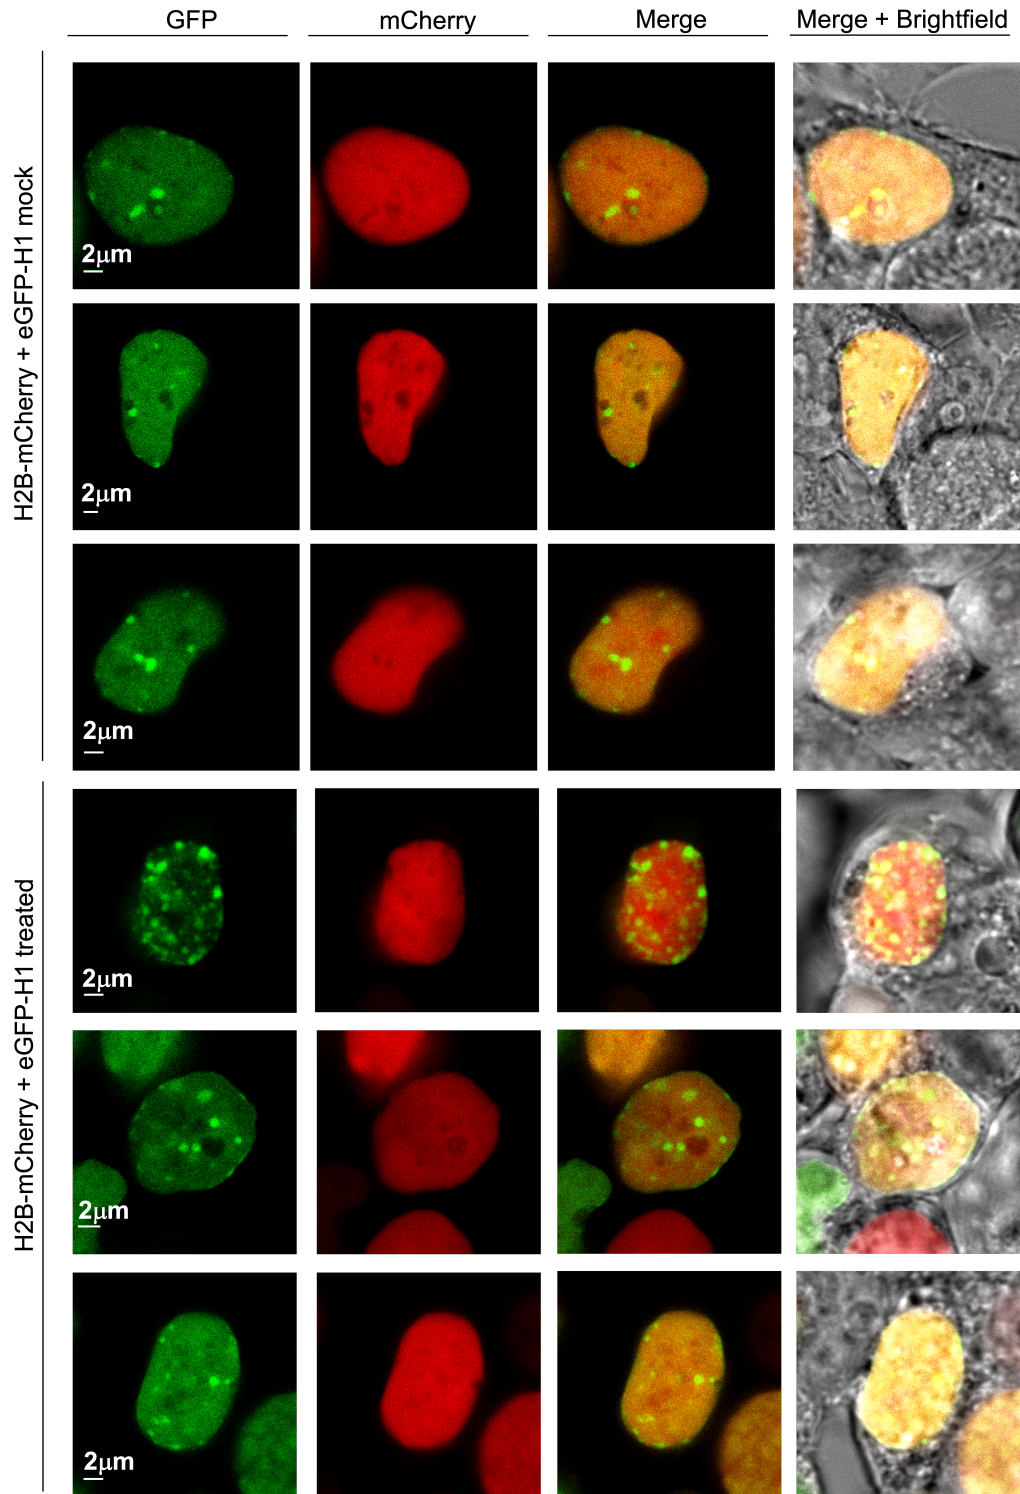

**Supplementary Fig. 5 | Additional examples of eGFP-H1 and H2B-mCherry co-transfected cells.** Representative confocal images of HEK293T cells co-transfected with H2B-mCherry and eGFP-H1 and treated with either mock or 2 mM HU + 20 μM AZD6738 for 18h. eGFP-H1, mock (n=16 independent nuclei); eGFP-H1, treated (n=20).

a

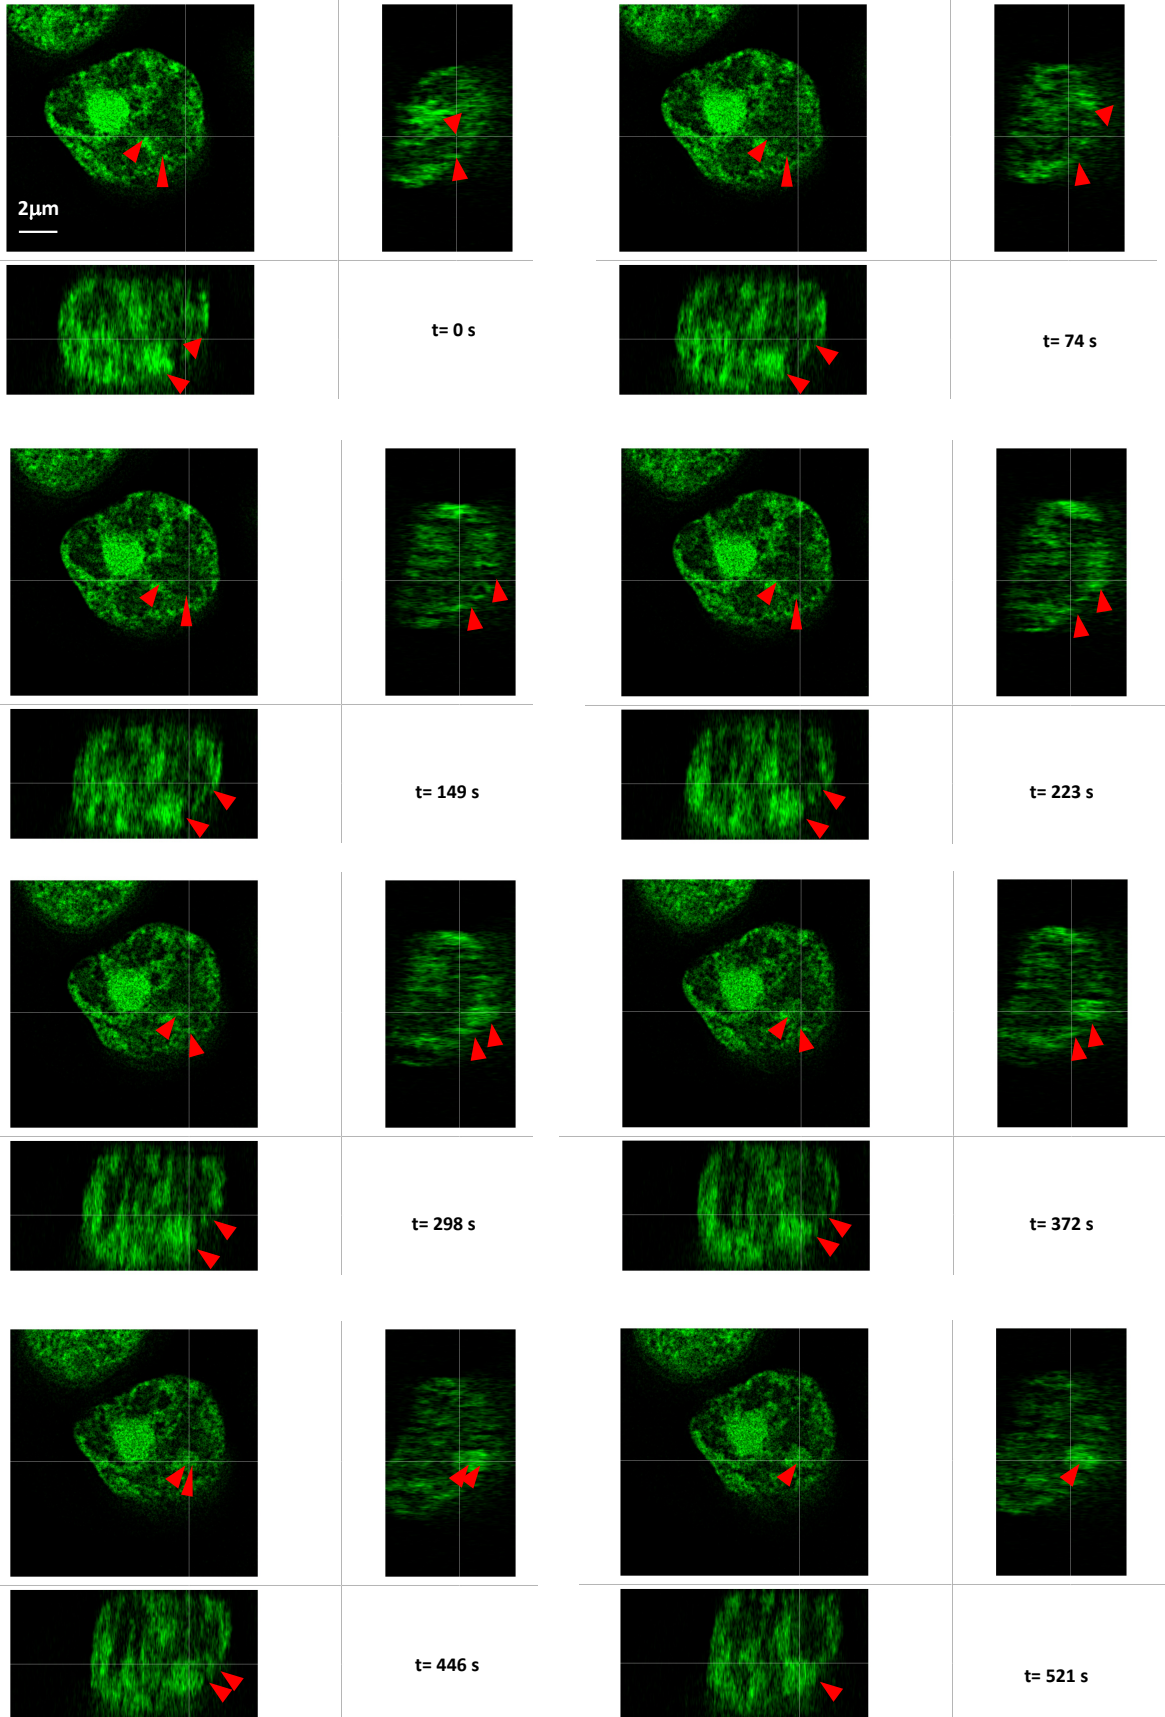

b

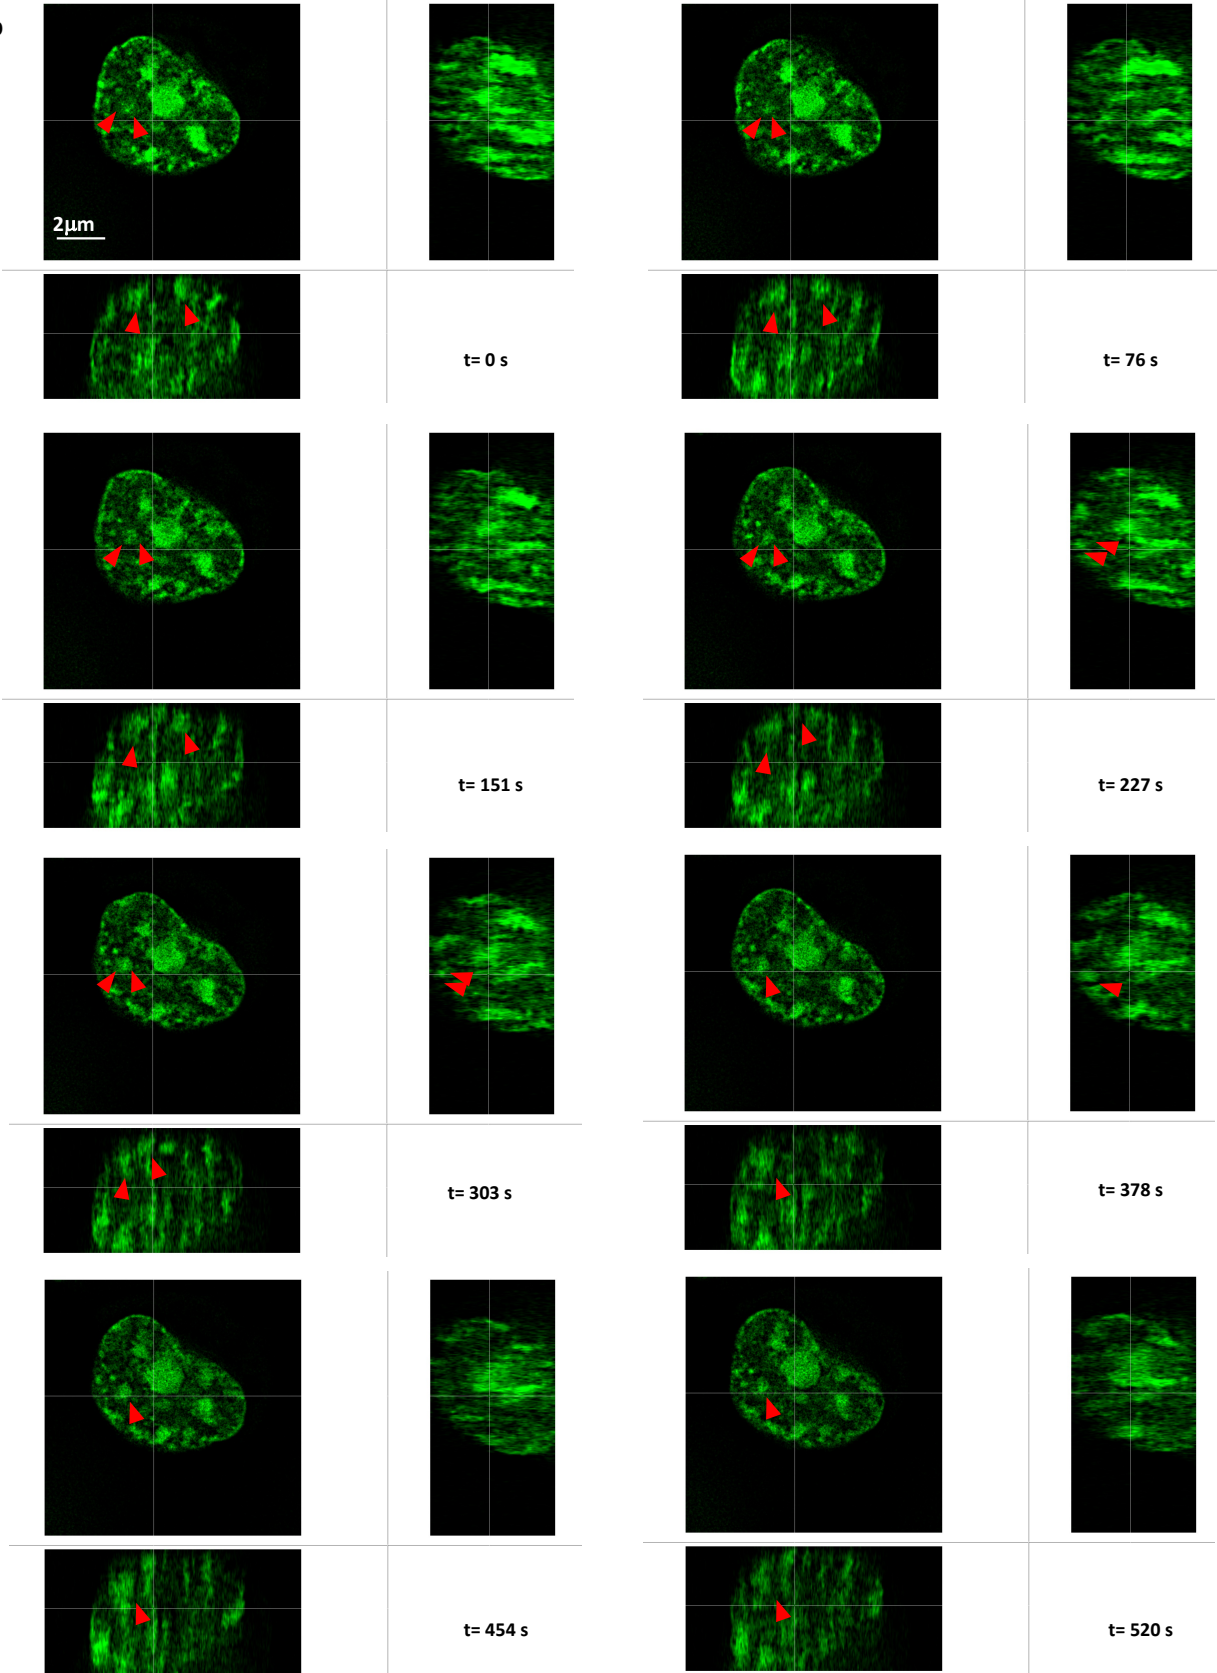



**c**

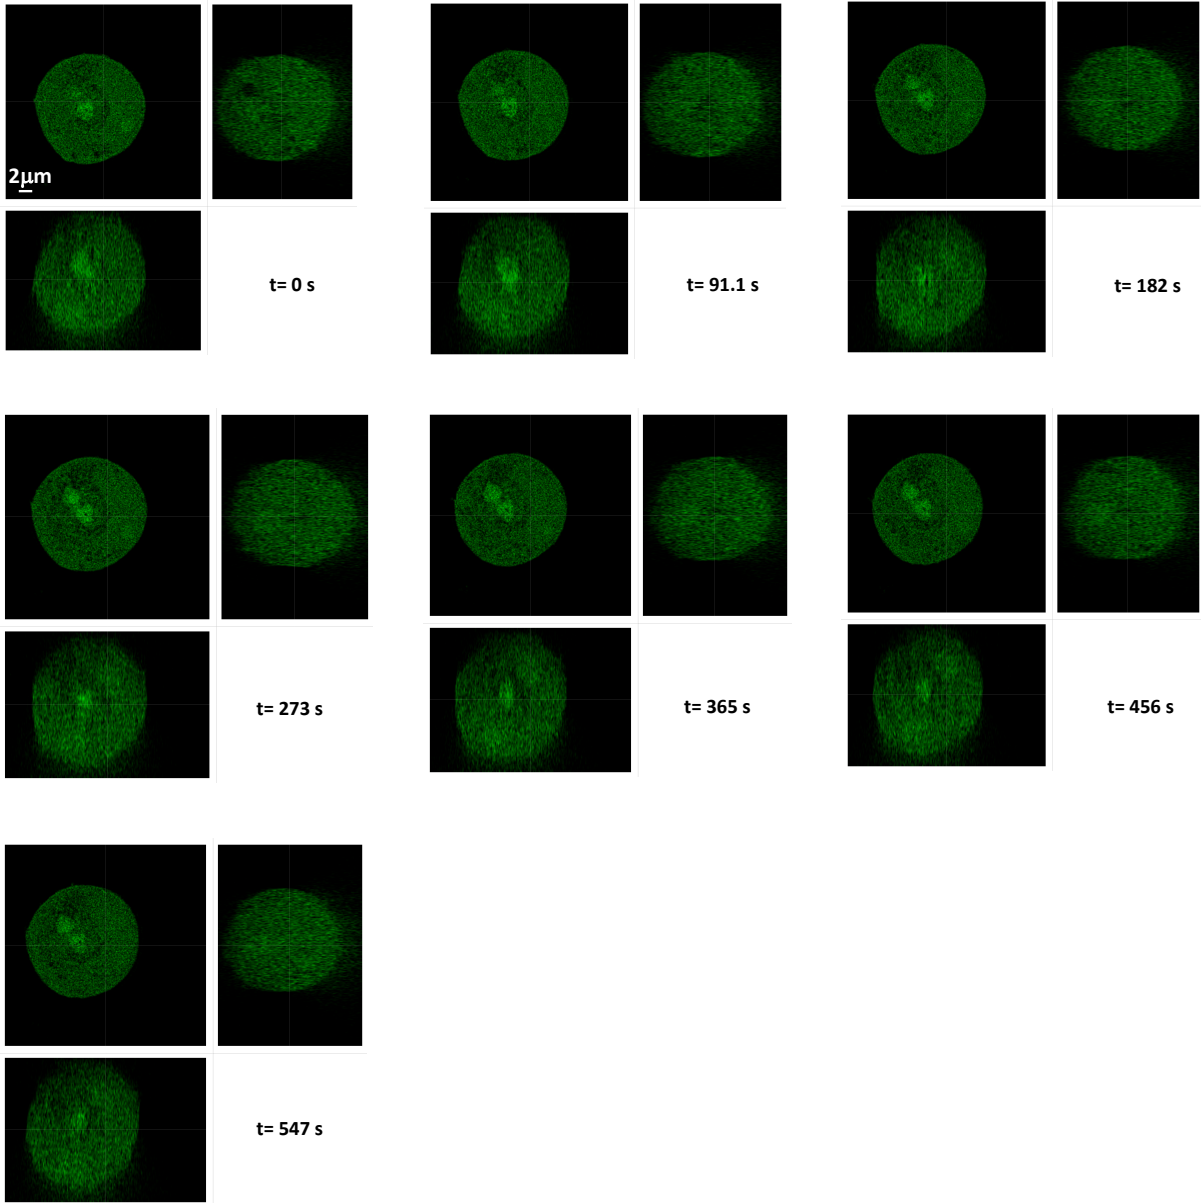

d

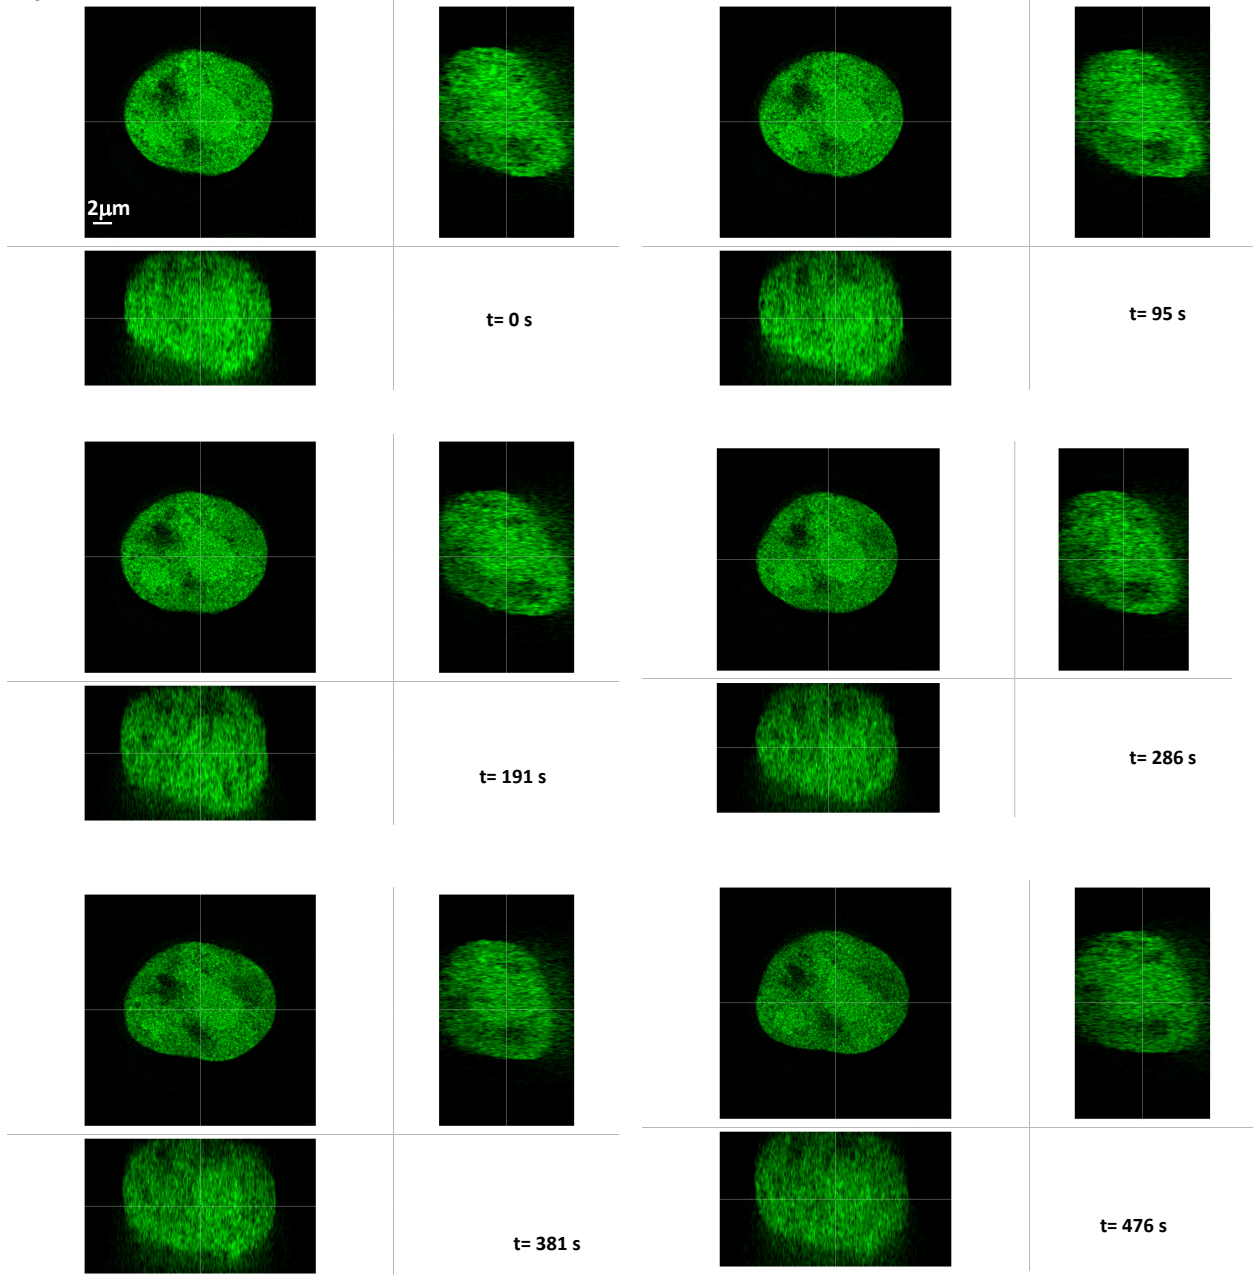

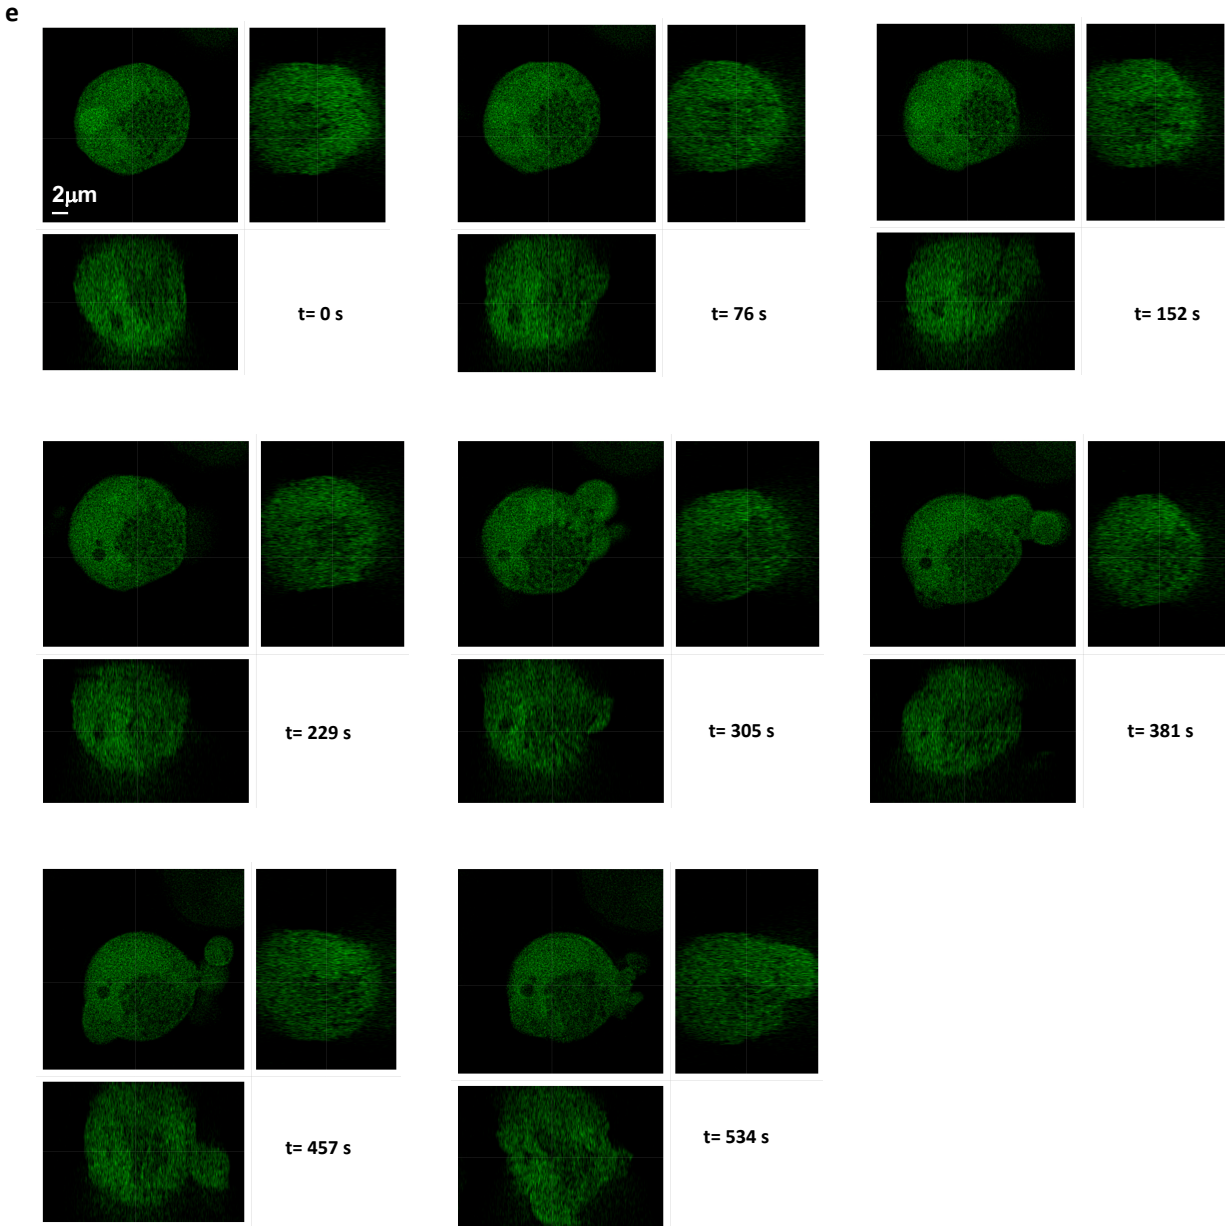

**Supplementary Fig. 6 | Timepoints from continuous Z-stack monitoring for merging eGFP-H1 puncta.** Slices from continuous Z-stack imaging over 10 minutes of HEK293T cells transfected with eGFP-H1 or eGFP-H1 $\Delta$ C and treated with either mock or 2 mM HU + 20  $\mu$ M AZD6738 for 18h. At each timepoint, top left= x plane, top right= y plane, bottom left= z plane. **a-b**, Representative slices (among 6 imaging acquisitions on independent nuclei) of eGFP-H1 treated with 2 mM HU + 20  $\mu$ M AZD6738. Red arrows highlight merging puncta. **c**, eGFP-H1 $\Delta$ C treated with 2 mM HU + 20  $\mu$ M AZD6738. **d**, eGFP-H1 with mock treatment. **e**, eGFP-H1 $\Delta$ C with mock treatment.

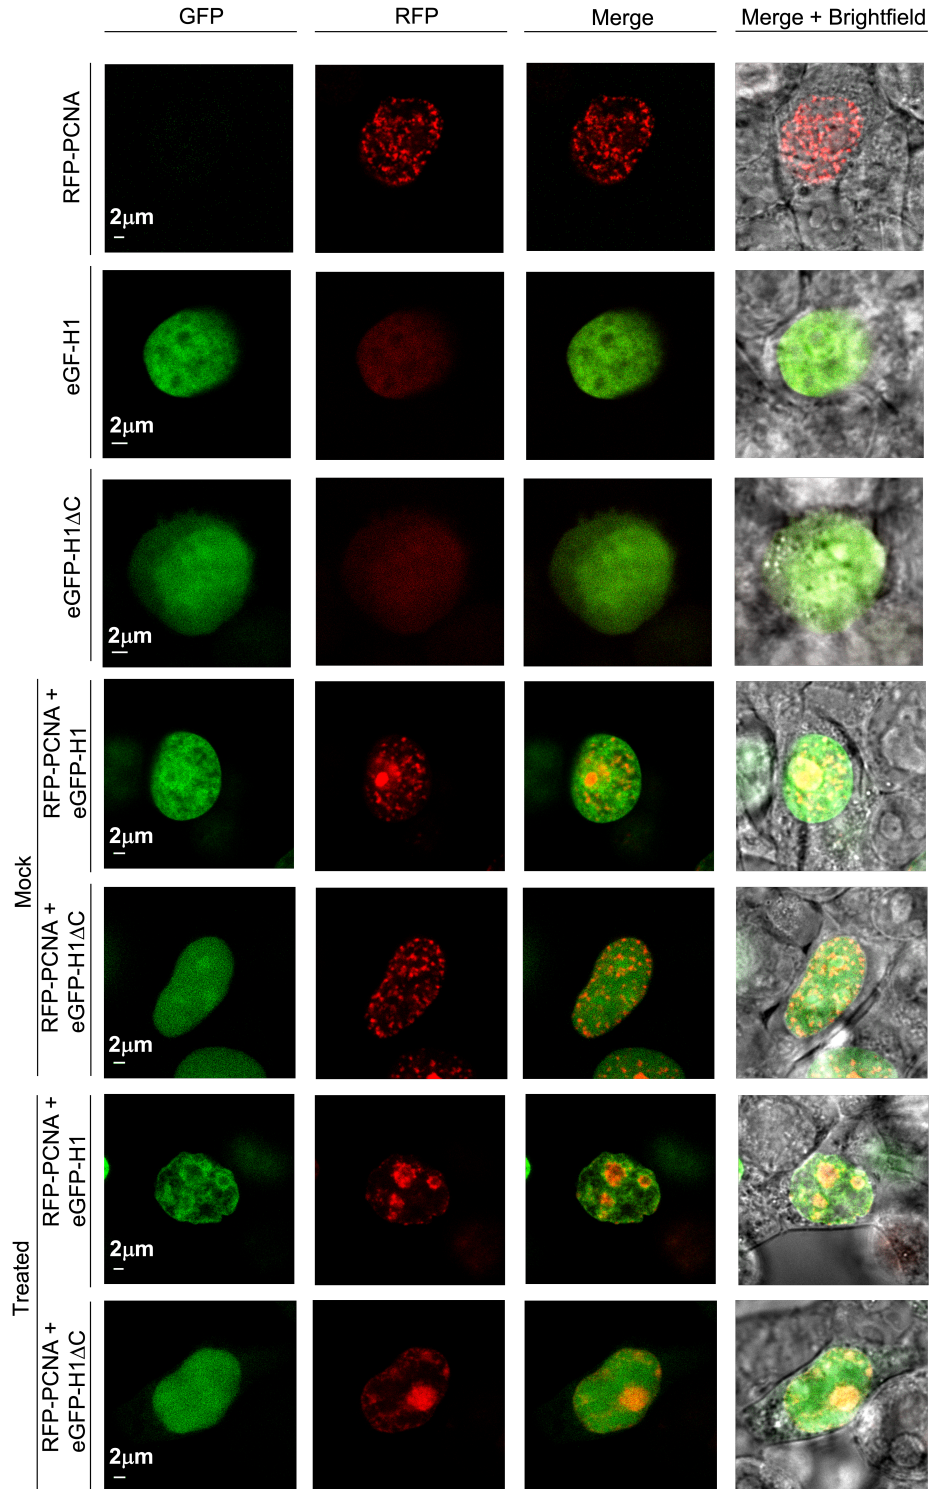

**Supplementary Fig. 7 | Nuclear distributions of eGFP-H1 and RFP-PCNA.** Representative confocal images and their corresponding brightfield images of HEK293T cells co-transfected with RFP-PCNA and either eGFP-H1 or eGFP-H1ΔC and treated with either mock or 2 mM HU + 20 μM AZD6738 for 18h. eGFP-H1, mock (n=12 independent nuclei); eGFP-H1ΔC, mock (n=9); eGFP-H1, treated (n=14); eGFP-H1ΔC, treated (n=12).

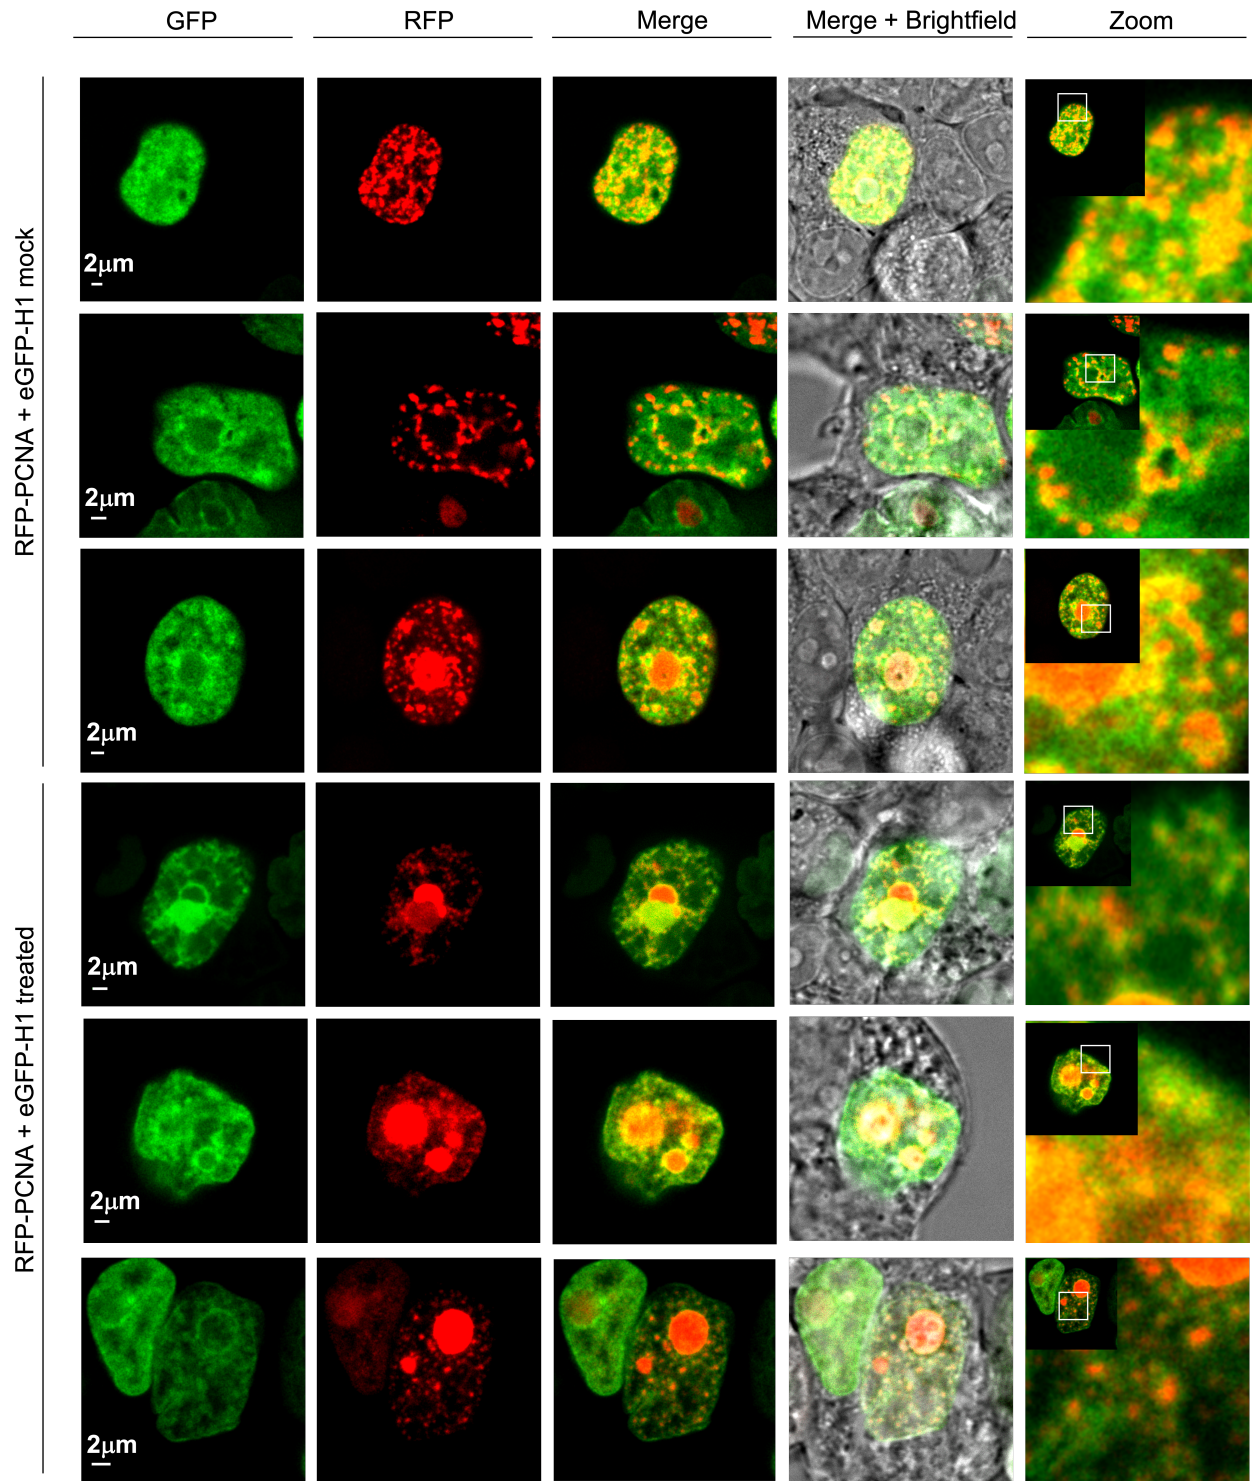

**Supplementary Fig. 8 | Additional examples of eGFP-H1 and RFP-PCNA co-transfected cells.** Representative confocal and brightfield images of HEK293T cells co-transfected with RFP-PCNA and eGFP-H1 and treated with either mock or 2 mM HU + 20 µM AZD6738 for 18h. eGFP-H1, mock (n=12 independent nuclei); eGFP-H1, treated (n=14).

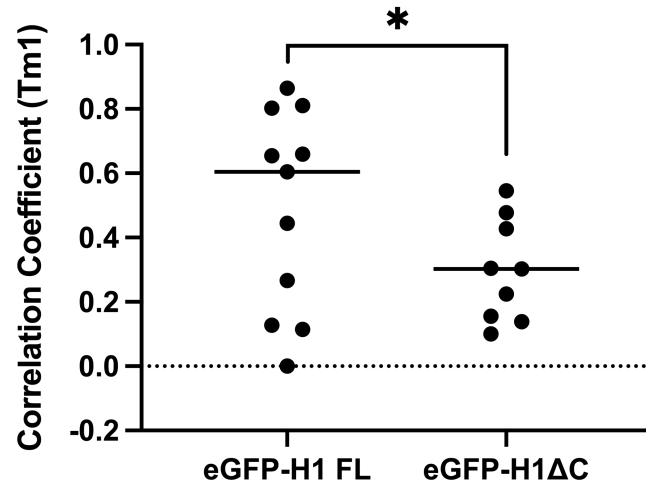

**Supplementary Fig. 9 | Quantification of eGFP-H1 colocalization with RFP-PCNA.** Scatter plot showing the distribution of Mander's tM1 auto-thresholded correlation coefficients for eGFP-H1 (n=11 independent nuclei) or eGFP-H1ΔC (n=9) (channel 1) colocalizing with RFP-PCNA (channel 2). Each point represents the coefficient for one nucleus. Significance calculated using Welch's t-test (\* $p < 0.05$ ).

### Supplementary Data

| A350                |            |
|---------------------|------------|
| ssDNA <sub>70</sub> | H1 only    |
| 0.12133333          | 0.00266667 |
| 0.12866667          | 0.001      |
| 0.11733333          | -0.0013333 |

### Supplementary Fig. 1b

| A350                                |                                     |                                    |                                     |                                     |                                    |
|-------------------------------------|-------------------------------------|------------------------------------|-------------------------------------|-------------------------------------|------------------------------------|
| ssDNA <sub>30</sub><br>(10 $\mu$ M) | dsDNA <sub>30</sub><br>(10 $\mu$ M) | dsDNA <sub>30</sub><br>(5 $\mu$ M) | ssDNA <sub>70</sub><br>(10 $\mu$ M) | dsDNA <sub>70</sub><br>(10 $\mu$ M) | dsDNA <sub>70</sub><br>(5 $\mu$ M) |
| 0.05833333                          | 0.048                               | 0.04                               | 0.12133333                          | 0.109                               | 0.101                              |
| 0.05966667                          | 0.052                               | 0.04533333                         | 0.12866667                          | 0.09133333                          | 0.10333333                         |
| 0.07                                | 0.05533333                          | 0.04433333                         | 0.11733333                          | 0.11333333                          | 0.09233333                         |

### Supplementary Fig. 1c

| A350                 |                |                     |
|----------------------|----------------|---------------------|
| ssDNA <sub>147</sub> | Mononucleosome | 12-nucleosome array |
| 0.18266667           | 0.062          | 0.054               |
| 0.22633333           | 0.076          | 0.063               |
| 0.20366667           | 0.078          | 0.059               |

### Supplementary Fig. 1d

| Correlation Coefficient (Tm1) |          |
|-------------------------------|----------|
| GFP-H1 FL                     | GFP-H1DC |
| 0.864                         | 0.1      |
| 0.654                         | 0.302    |
| 0.552                         | 0.545    |
| 0.605                         | 0.478    |
| 0.659                         | 0.138    |
| 0.444                         | 0.427    |
| 0.592                         | 0.304    |
| 0.81                          | 0.155    |
| 0.266                         | 0.224    |
| 0.127                         |          |
| 0                             |          |
| 0.114                         |          |
| 0.802                         |          |

**Supplementary Fig. 9**
