# Supplementary material
Source: PubMed Central journal article supplement (PMC9117509)

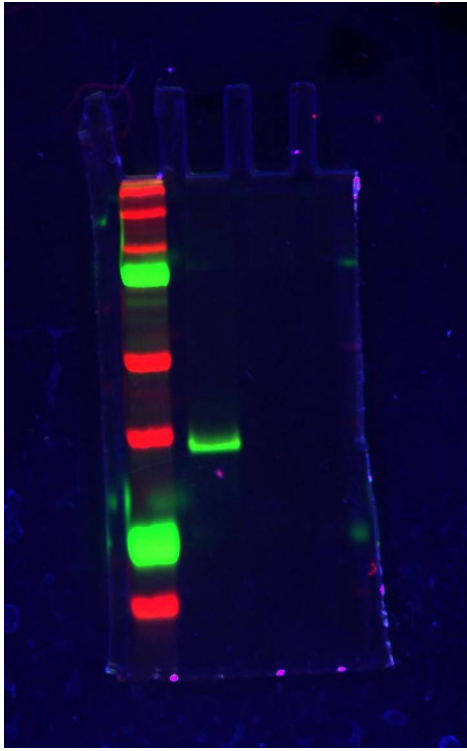

**Extended Data Fig. 1c**

Supplement: NIHMS1794537-supplement-1794537_SD_ED_fig_1.pdf [file NIHMS1794537-supplement-1794537_SD_ED_fig_1.pdf]
